# Supplementary material for: Hemp Agronomy: Current Advances, Questions, Challenges, and Opportunities
Source: MDPI journal article supplement (doi:10.3390/agronomy13020475), 2023-02-06
Supplement: s1 [file s1]

**Supplementary Table S1:** Details of genotypes used in different studies included in this review

| Citation (from the list of references in the main text) | Genotype(s)                                                                                                                                                                                                                                                                                                                                                                                                                                     |
|---------------------------------------------------------|-------------------------------------------------------------------------------------------------------------------------------------------------------------------------------------------------------------------------------------------------------------------------------------------------------------------------------------------------------------------------------------------------------------------------------------------------|
| [41] Sengloung et al., 2009                             | Thai hemp                                                                                                                                                                                                                                                                                                                                                                                                                                       |
| [8] Zhang et al., 2021                                  | <p>1. Essential oil hemp</p> <p>Cherry Wine<br/>Cherry Blossom<br/>Cherry*T1<br/>Berry Blossom<br/>Cherry Blossom-Tuan<br/>ACDC<br/>Super CBD<br/>Cherry<br/>Wife<br/>Cherry Blossom<br/>JL Baux<br/>ACDC<br/>Cherry Wine<br/>Cherry<br/>Wife</p> <p>2. Fiber hemp</p> <p>CFX-1<br/>Joey<br/>Tygra<br/>Helena (Serbia)<br/>Carmagnola Selezionata<br/>Fibranova<br/>Eletta Campana<br/>HAN-FN-H<br/>HAN-NE<br/>HAN-NW<br/>PUMA-3<br/>PUMA-4</p> |
| [42] Islam et al., 2021                                 | <i>Cannabis sativa</i> L. strain India                                                                                                                                                                                                                                                                                                                                                                                                          |
| [67] Campbell et al., 2019                              | <p>Bialobrzeskie<br/>Carmaleonte<br/>CS<br/>Diana<br/>Eletta Campana<br/>Fedora 17<br/>Felina 32<br/>Ferimon 12<br/>Futura 75 (France)<br/>Monoica<br/>Santhica 27</p>                                                                                                                                                                                                                                                                          |

|                                |                                                                                                                                                                                                                                                                                      |
|--------------------------------|--------------------------------------------------------------------------------------------------------------------------------------------------------------------------------------------------------------------------------------------------------------------------------------|
|                                | Tiborszallasi                                                                                                                                                                                                                                                                        |
| [68] Satriani et al., 2021     | Futura 75 (France)<br>Uso 31 (France)                                                                                                                                                                                                                                                |
| [69] Sheldon et al. (2021)     | Finola<br>Kurd<br>Joey<br>Felina,<br>CFX-2<br>Delores<br>Canda<br>Ha3ze<br>Carolina<br>T1 Topped [T1 T]<br>T1 Not Topped [T1 NT] Cherry Topped [Cherry T]<br>Cherry Not Topped [Cherry NT]                                                                                           |
| [70] Caplan et al. (2019)      | Nebula                                                                                                                                                                                                                                                                               |
| [72] Babaei and Ajdanian 2020  | Qzv-02<br>Sav-01<br>Ney-01<br>Rash-01<br>Bsh-01<br>45 ecotypes were used in this study. Complete details are not available                                                                                                                                                           |
| [73] Blandinieres et al., 2021 | Asso<br>Bernabeo<br>Bialobrzeskie<br>Carma<br>Carmagnola<br>Carmaleonte<br>Codimono<br>CS<br>Dioica 88<br>Earlina 8<br>Eletta<br>Epsilon 68<br>Ermes<br>Felina 32<br>Ferimon 12<br>Fibranova<br>Fibrante<br>Fibror 79<br>Finola<br>Futura 75<br>Futura 83<br>Orion 33<br>Santhica 23 |

|                                   |                                                                                                   |
|-----------------------------------|---------------------------------------------------------------------------------------------------|
|                                   | Santhica 27<br>Santhica 70<br>Uso 31                                                              |
| [10] Jiang et al., (2021)         | Hanma No. 2                                                                                       |
| [43] Baldini et al. (2020)        | Bialobrzeskie<br>Chamaeleon<br>CS<br>Ermes<br>Fedora 17<br>USO 31                                 |
| [71] Park et al., 2022            | Green-Thunder                                                                                     |
| [50] Herppich et al., (2020)      | Santhica 27<br>Ivory                                                                              |
| [11] Toth et al. (2021)           | TJ's CBD<br>T2<br>GVA-H-19-1039                                                                   |
| [75] Hu et al., 2018              | Yunma 5<br>Bamahuoma                                                                              |
| [77] Dixit (2022)                 | CFX-2<br>Joey<br>Bialobrzeskie<br>Henola                                                          |
| [78] Bolt et al., 2021            | CF-1<br>Futura 75<br>X-59                                                                         |
| [62] Anderson II et al., 2021     | Cherry Blossom<br>Cherry Blossom [Tuan]<br>Berry Blossom<br>Cherry Wine<br>Cherry Blossom × Trump |
| [79] Campiglia et al., 2020       | Epsilon 68<br>Fedora 17<br>Felina 32<br>Ferimon<br>Future 75<br>Santhica 27<br>Uso 31             |
| [60] Tang et al., 2017            | Future 75<br>Bialobrzeskie                                                                        |
| [58] Deng et al., 2019            | Yunma 1                                                                                           |
| [55] Shiponi and Bernstein (2021) | Royal Medic<br>Desert Queen                                                                       |
| [81] Vera et al., 2004            | Fasamo<br>Finola                                                                                  |
| [84] Amaducci et al. (2008)       | Future 75<br>Tiborszallasi                                                                        |

|                                        |                                                                                                                                                                                      |
|----------------------------------------|--------------------------------------------------------------------------------------------------------------------------------------------------------------------------------------|
| [85] Garcia-Tejero et al., 2020 (2020) | Sara<br>Pilar<br>Aida<br>Theresa<br>Juani                                                                                                                                            |
| [17] Hall et al., 2014a                | BundyGem                                                                                                                                                                             |
| [45] Cosentino et al. (2012)           | Futura 75<br>Felina 34<br>Fibranova<br>Tiborszallasi                                                                                                                                 |
| [27] Garcia-Tejero et al., 2019        | Carma<br>Ermes                                                                                                                                                                       |
| [86] Tsaliki et al. (2021)             | Santhica 27<br>Fedora 17<br>Felina 32<br>Futura 75<br>Tygra<br>Bialobrzeskie                                                                                                         |
| [39] Hall et al. (2013)                | BundyGem                                                                                                                                                                             |
| [88] Calzolari et al., 2017            | Ermes<br>Santhica 27<br>Ermo                                                                                                                                                         |
| [89] Hoppner and Menge-Hartmann, 2007  | Fasamo<br>Juso 14<br>Juso 31<br>Solotonosker 11<br>Solotonosker 15<br>Fedora 19<br>Ferimon<br>Felina 34<br>Fedrina 74<br>Futura<br>Secuieni 1<br>Lovrin 110<br>Uniko-BF2<br>Kompolti |
| [91,92] Abdollahi et al., 2020a, 2020b | Fedora 17<br>Fars<br>Yazd                                                                                                                                                            |
| [101] Husain et al. (2019)             | Fedora 17<br>Felina 32<br>Ferimon<br>Futura 75<br>Santhica 27<br>USO 31                                                                                                              |
| [102] Deng et al. (2021)               | Bamahuoma                                                                                                                                                                            |

J. Sunoj Valiaparambil Sebastian et al. 2023. Hemp Agronomy: Current Advances, Questions, Challenges, and Opportunities

|                              |           |
|------------------------------|-----------|
|                              | Yunma-1   |
| [104] Linger et al (2002)    | USO 31    |
| [105] Linger et al (2005)    | USO 31    |
| [106] Shi and Cai (2009)     | YM12      |
| [100] Citterio et al. (2003) | Fibranova |
